# 1 Piloting wastewater-based surveillance of norovirus in England

2 David I. Walker<sup>a</sup>, Jessica Witt<sup>a</sup>, Wayne Rostant<sup>a</sup>, Robert Burton<sup>c</sup>, Vicki Davison<sup>c</sup>, Jackie Ditchburn<sup>c</sup>,  
3 Nicholas Evens<sup>c</sup>, Reg Godwin<sup>c</sup>, Jane Heywood<sup>a</sup>, James Lowther<sup>a</sup>, Nancy Peters<sup>c</sup>, Jonathan Porter<sup>c</sup>,  
4 Paulette Posen<sup>a</sup>, Tyler Wickens<sup>c</sup>, Matthew J. Wade<sup>b</sup>

5 <sup>a</sup> Centre for Environment, Fisheries and Aquaculture Science, Weymouth, Dorset, UK

6 <sup>b</sup> Data Analytics & Surveillance Group, UK Health Security Agency, 10 South Colonnade, London, UK

7 <sup>c</sup> Environment Agency, National Monitoring Laboratories, Staplake Mount, Starcross, Devon, UK

8 Corresponding author: David I. Walker ([david.walker@cefas.gov.uk](mailto:david.walker@cefas.gov.uk))

9

## 10 Abstract

11 Wastewater-based epidemiology (WBE) gained widespread use as a tool for supporting clinical  
12 disease surveillance during the COVID-19 pandemic. There is now significant interest in the  
13 continued development of WBE for other pathogens of clinical significance. In this study,  
14 approximately 3,200 samples of wastewater from across England, previously collected for  
15 quantification of SARS-CoV-2, were re-analysed for the quantification of norovirus genogroup I (GI)  
16 and II (GII). Overall, GI and GII were detected in 93% and 98% of samples respectively, and at least  
17 one of the genogroups was detected in 99% of samples. GI was found at significantly lower  
18 concentrations than GII, but the proportion of each genogroup varied over time, with GI becoming  
19 more prevalent than GII in some areas towards the end of the study period (May 2021 – March  
20 2022). Using relative strength indices (RSI), it was possible to study the trends of each genogroup,  
21 and total norovirus over time. Increases in norovirus levels appeared to coincide with the removal of  
22 COVID-19 related lockdown restrictions within England. Local Moran's I analyses indicated several  
23 localised outbreaks of both GI and GII across England, notably the possible GI outbreak in the north  
24 of England in early 2022. Comparisons of national average norovirus concentrations in wastewater  
25 against concomitant norovirus reported case numbers showed a significant linear relationship. This  
26 highlights the potential for wastewater-based monitoring of norovirus as a valuable approach to  
27 support surveillance of norovirus in communities.

## 28 Introduction

29 Wastewater-based epidemiological (WBE) has been documented as an approach for monitoring  
30 disease since at least the 1930s. Early studies demonstrated that poliovirus could be detected in  
31 urban sewage and this could be used to indicate presence of polio in communities (Paul, Trask and  
32 Gard, 1940). With the advent of analytical techniques such as PCR, sequencing, and mass  
33 spectrometry, quantifying and characterising biological and chemical signatures in wastewater has  
34 become simpler, faster, and more precise (Gracia-Lor *et al.*, 2017; Sims and Kasprzyk-Hordern, 2020;

35 Kasprzyk-Hordern *et al.*, 2023). This has greatly expanded the capacity to investigate and respond to  
36 public health threats through the analysis of wastewater samples, which established WBE as a  
37 complementary source of data during the COVID-19 pandemic (Diamond *et al.*, 2022).

38 The rapid expansion of the use of WBE tools from the start of the COVID-19 pandemic in early 2020  
39 resulted in wide-scale implementation of wastewater monitoring networks across many countries  
40 (COVIDPoops19, 2023; Keshaviah *et al.*, 2023). From 2020 to 2022, the Environmental Monitoring  
41 for Health Protection (EMHP) programme in England was one of the largest of such networks, with  
42 over 500 sites being monitored for SARS-CoV-2 several times per week at its peak (UKHSA, 2023a),  
43 covering approximately 74% of the English population (UKHSA, 2023c).

44 Following WBE for monitoring human health threats such as SARS-CoV-2 and poliovirus (Klapsa *et*  
45 *al.*, 2022; Link-Gelles *et al.*, 2022), there has been significant interest in its application for monitoring  
46 other pathogens, including the spread of Antimicrobial Resistance (AMR) (Aarestrup and Woolhouse,  
47 2020), human respiratory viruses (Boehm *et al.*, 2023) and MPox (Wolfe *et al.*, 2023).

48 For WBE to be an effective system for disease surveillance, the target pathogens must enter human  
49 wastewater. This is predominantly due to the presence of the pathogens in the faeces and urine of  
50 infected individuals, although they may also enter the sewage via other bodily excreta (Jones *et al.*,  
51 2020). For respiratory diseases such as COVID-19, the pathogens may be present in faeces due to  
52 replication of virus within the gastrointestinal tract or through ingestion of mucus from the upper  
53 respiratory tract (Hirose *et al.*, 2017). This may result in a relatively low abundance of respiratory  
54 pathogens, leading to limited detectability where cases within communities are low, where faecal  
55 shedding occurs in a small proportion of infected individuals, or where the target pathogen has  
56 limited environmental stability.

57 In contrast, enteric pathogens such as norovirus (NoV) are often shed in very high numbers in the  
58 faeces of infected individuals and tend to be relatively stable in the environment (Bosch, Pintó and  
59 Abad, 2006; Gholipour *et al.*, 2022). NoV are a major global cause of acute gastroenteritis (AGE).

60 With transmission of NoV through contaminated food and water being an important pathway, and  
61 the high viral loads shed by infected individuals ( $8 - 10 \log_{10}$  gene copies (NoV)/ml versus  $2 - 7 \log_{10}$   
62 gene copies (SARS-CoV-2)/ml, (Jones *et al.*, 2020)), monitoring of wastewater presents an  
63 opportunity for collecting data on temporospatial dynamics of the disease in populations.

64 NoV specific studies from wastewater samples have demonstrated the value in employing WBE to  
65 provide epidemiological information on the disease. Several studies have shown that molecular  
66 methods, such as RT-qPCR (Zhou *et al.*, 2016) and high-throughput sequencing (Kazama *et al.*, 2016;  
67 Fumian *et al.*, 2019), are able to quantify and characterise the diversity of NoV present in  
68 wastewater, with genogroups I (GI), II (GII) and the less common IV (GIV) being those associated with  
69 human infection.

70 In the UK and other developed countries, NoV outbreaks tend to exhibit well-defined seasonality,  
71 with peak case numbers occurring in the winter months. However, during the COVID-19 pandemic,  
72 there was evidence of decreased NoV prevalence due to the introduction of COVID-19-related non-  
73 pharmaceutical interventions (NPIs) in many countries. For example, a study from oyster production  
74 areas in Ireland showed that while NoV was detected in 94.3 and 96.6% of oyster samples in the two  
75 winters preceding the COVID-19 pandemic, this value decreased to 63.2% in the winter of 2020 to  
76 2021 (Keaveney *et al.*, 2022). Wang *et al.* (2023), showed that the transmission of NoV GII was  
77 significantly reduced by the introduction of public restrictions on movement and good hygiene  
78 practice in Sweden. After these restrictions were lifted in February 2022, peak NoV GII cases were  
79 observed at five times the magnitude of those recorded in 2017. This phenomenon was replicated in  
80 other countries, such as the UK, where the reduction in NoV reporting was attributed to multiple  
81 factors including changes in ascertainment, testing capacity, access to healthcare, and the impact of  
82 NPIs (UKHSA, 2023b).

83 This study contributed to the Pathogen Surveillance in Agriculture, Food and the Environment  
84 (PATH-SAFE) Programme, the overall aims of which were to pilot a improved national surveillance

85 systems for the monitoring foodborne disease (FBD) and antimicrobial resistance (AMR) in the UK.  
86 We aimed to increase our understanding of how wastewater-based methods can give insights into  
87 the prevalence of NoV in communities to aid epidemiological investigations. Using an existing set of  
88 samples previously collected for the EMHP programme, we used a ‘one sample, many analyses’  
89 approach to pilot a more cost effective, non-invasive, multi-agency national surveillance system.  
90 Using RT-qPCR assays, we quantified NoV genogroup I (GI) and II (GII) as the most prevalent NoV  
91 genogroups known to cause disease in humans.

## 92 [Methods](#)

### 93 [Site and Sample Selection](#)

94 Samples of screened, untreated sewage were collected as part of the Environmental Monitoring for  
95 Health Protection (EMHP) programme, which was to monitor SARS-CoV-2 in wastewater in England  
96 as described by Wade et al. (2022) and Morvan *et al.* (2022). A subset of 3,232 samples, collected  
97 between 27<sup>th</sup> May 2021 and 30<sup>th</sup> March 2022 from 152 sewage treatment works (STW) across  
98 England, were selected (Figure 1). The number of STWs in each of the nine regions of England (ONS,  
99 2017) are shown in Table 1. STWs that served the largest populations (based on population data  
100 from the Office for National Statistics) were prioritised so that a greater proportion of the  
101 population was covered with the minimum number of samples.

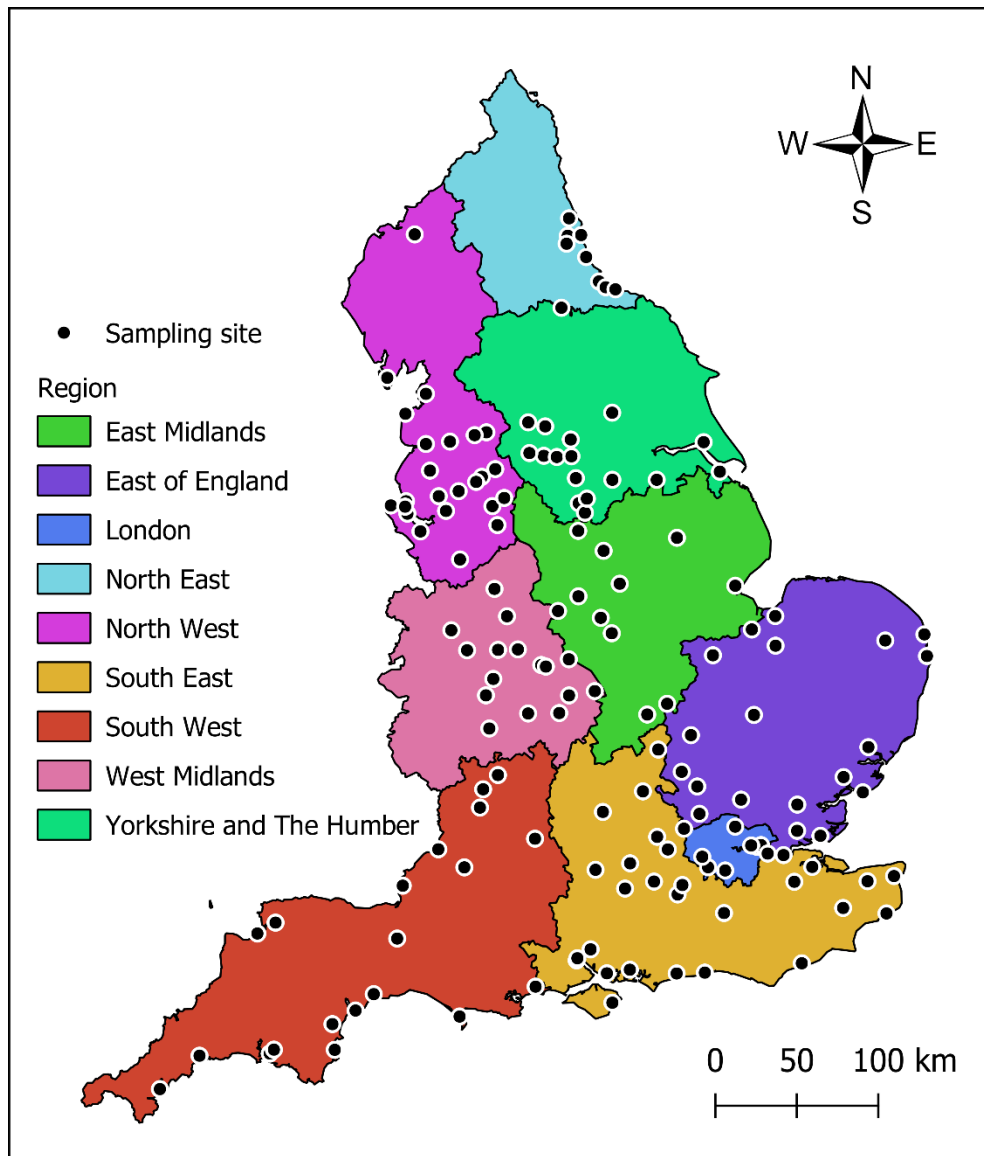

102

103 *Figure 1: Map showing the sampling sites for this study and the regions of England (ONS, 2017) in which the sites were*  
104 *located.*

105 The STWs selected for this study were estimated to serve a population of approximately 34 million  
106 people, equivalent to approximately 60% of the population of England in mid-2021 according to ONS  
107 data (ONS, 2022).

108 We aimed to analyse one sample per STW every two weeks to maximise both the temporal and  
109 spatial coverage that could be achieved within the resource limitations of the project. The samples  
110 used for this study are summarised in Table 1. Full details of the samples are available from (David I.  
111 Walker *et al.*, 2024).

112 *Table 1 Summary of the wastewater samples analysed for norovirus by English region.*

| Region                   | Number of sites | Total samples tested | Earliest sampling date | Latest sampling date | Average sampling interval (days) | Average samples tested per site |
|--------------------------|-----------------|----------------------|------------------------|----------------------|----------------------------------|---------------------------------|
| East Midlands            | 10              | 221                  | 31/05/2021             | 25/03/2022           | 14.2                             | 22.1                            |
| East of England          | 20              | 440                  | 31/05/2021             | 21/03/2022           | 13.9                             | 22.0                            |
| London                   | 8               | 177                  | 30/05/2021             | 25/03/2022           | 13.9                             | 22.1                            |
| North East               | 9               | 172                  | 31/05/2021             | 28/03/2022           | 13.9                             | 19.1                            |
| North West               | 24              | 480                  | 27/05/2021             | 30/03/2022           | 13.9                             | 20.0                            |
| South East               | 28              | 617                  | 28/05/2021             | 30/03/2022           | 13.9                             | 22.0                            |
| South West               | 20              | 429                  | 30/05/2021             | 30/03/2022           | 14.0                             | 21.5                            |
| West Midlands            | 17              | 375                  | 30/05/2021             | 30/03/2022           | 13.9                             | 22.1                            |
| Yorkshire and The Humber | 16              | 321                  | 30/05/2021             | 25/03/2022           | 14.1                             | 20.1                            |
| Total                    | 152             | 3232                 | 27/05/2021             | 30/03/2022           | 14.0                             | 21.2                            |

113

#### 114 Ammonia and Orthophosphate Quantification

115 Ammonia and orthophosphate concentrations (mg/l) were measured in wastewater samples within  
116 24 hours of collection according to the Environment Agency's in-house methods. These methods  
117 were based on the relevant Standing Committee of Analysts methods (Standing Committee of  
118 Analysts, 1981, 1992) and adapted for use with the Gallery Plus Discrete Analyser (Thermo Fisher  
119 Scientific, UK).

#### 120 Viral concentration and RNA extraction

121 Viruses were concentrated and the RNA extracted from wastewater samples according to Walker et  
122 al. (2024). Briefly, 200 ml of wastewater was clarified by centrifugation before a phi6 process control  
123 and 60 g ammonium sulphate was added to 150 ml of the supernatant and incubated at 4°C for at  
124 least 1 hour. These were then further centrifuged, and lysis buffer was added directly to the viral  
125 pellet before purification using BioMerieux's (France) NucliSENS magnetic silica reagents on a  
126 KingFisher™ Flex Purification system (Thermofisher).

## 127 RT-qPCR

128 As part of the COVID-19 monitoring programme, the phi6 process control was used to determine  
129 viral recovery as described by Walker et al. (2024) . The RNA extracts were subsequently refrozen at  
130 -80°C until required for NoV RT-qPCR.

131 NoV GI and GII were quantified in each sample using a duplex RT-qPCR adapted from Alex-Sanders *et*  
132 *al.* (2023) in duplicate for each sample. The NoV RT-qPCR followed the same procedures as  
133 described by Alex-Sanders *et al.*, except the GI probe was synthesised by Eurogentec (Belgium) and  
134 used an MGB-Eclipse quencher. The GII probe was synthesised by Integrated DNA Technologies (UK)  
135 and used a HEX™ reporter dye and was double-quenched by ZEN™ and IB®FQ quenchers. The  
136 reactions were carried out on an Aria MX real-time PCR machine (Agilent). Samples were quantified  
137 relative to an RNA standard dilution series that was included on each RT-qPCR plate. A duplicate  
138 standard curve was constructed from a four point, ten-fold dilution series of RNA Ultramers  
139 (Integrated DNA Technology) containing the RT-qPCR target sequences and diluted in Tris-EDTA  
140 containing 1% Triton-X (TEX buffer). RT-qPCR results were accepted if the standard curve had an R<sup>2</sup>  
141 of >0.98 and a slope of between -3.6 and -3.1.

142 The Limit of Detection (LOD) and Limit of Quantification (LOQ) for GI and GII RT-qPCRs were  
143 measured based on the methods described by Walker (2022).

144 Previous studies had indicated low RT-qPCR inhibition using this system, so inhibition was not tested  
145 in this study (Alex-Sanders *et al.*, 2023; Scott *et al.*, 2023).

## 146 Data analysis

### 147 *Comparability of nutrient data*

148 A Spearman's ranked correlation was used to determine whether the log<sub>10</sub> ammonia and log<sub>10</sub>  
149 orthophosphate concentrations data followed similar trends and could therefore be used in parallel  
150 for flow normalisation. Additionally, a Wilcoxon signed-rank test was used to determine whether



151 there were significant pairwise differences between  $\log_{10}$  ammonia and  $\log_{10}$  orthophosphate  
152 concentrations.

### 153 *Norovirus data censoring and normalisation*

154 Following RT-qPCR, GI and GII concentrations below LOQ or LOD were censored by assigning a value  
155 of LOQ/2 to positive samples with concentrations  $<LOQ$  and a value of LOD/2 to samples with no GI  
156 or GII detected. The GI and GII concentrations in the original wastewater samples were calculated  
157 according to Walker *et al.* (2024).

158 The GI and GII concentrations were normalised for flow and population according to nutrient  
159 concentrations, using a method adapted from Roberts *et al.* (2022). The normalisation method  
160 applied in this study differed from the Roberts *et al.* method by including both ammonia and  
161 orthophosphate as determinants for flow. For each sampling site, anomalous ammonia and  
162 phosphate concentrations were removed using a three-sigma outlier approach. Mean ammonia and  
163 orthophosphate levels were calculated for each sampling site with anomalous data removed.

164 For each sample, flow was calculated separately with  $\log_{10}$  ammonia and orthophosphate  
165 concentration according to Roberts *et al.* (2022), and the mean of the two values was used as the  
166 overall flow measurement for normalisation. Where data were missing for both nutrients, the  
167 sample was excluded from further analysis. The normalised NoV concentrations were presented as  
168 gene copies per 100,000 capita (copies/100k capita).

169 Total NoV concentration was calculated as the sum of GI and GII concentrations after censoring.

170 Analyses were carried out using  $\log_{10}$  flow and population-normalised GI and GII and total NoV data.

### 171 *Differences in genogroup concentrations ( $\Delta G$ )*

172 Differences in GI and GII concentrations were modelled by comparing fitted smooths in factor-  
173 smooth interactions of simple Generalized Additive Models (GAMs) (Simpson, 2017). The models  
174 may be represented as:

175 
$$E(y_{i,j}) = \alpha + \beta_{Geno} + f(Time_i) + f(Time_i) \times Geno$$

176 where  $y_{i,j}$  is the  $\log_{10}$  concentration at time point  $i$  of genogroup  $j$ ,  $\alpha$  is the parametric effect of  
177 genogroup II ( i.e. the reference level),  $\beta_{Geno}$  is the parametric effect of genogroup I,  $f(Time_i)$  is  
178 the smooth function of Time on genogroup II and  $f(Time_i) \times Geno$  is the smooth function  
179 representing the trend in difference between  $\log_{10}$  GI and GII concentrations. From these models the  
180 trends in  $\log_{10}$  difference between GI and GII concentrations ( $\Delta G$ ) were obtained using the difference  
181 smooth term  $f(Time_i) \times Geno$  offset by the  $\beta_{Geno}$  coefficient. Thin-plate regression splines were  
182 used to parametrise the smooth functions,  $f()$  (Wood, 2003) and models were fit in R using the  
183 mgcv package, version 1.8-41 (Wood, 2017). Plotting of modelled trends in  $\Delta G$  was implemented  
184 with the gratia package, version 0.8.2 (Simpson, 2024).

185 *Temporal trends in the national and regional datasets*

186 To analyse temporal trends in NoV concentrations and  $\Delta G$  in wastewater across England, data were  
187 aggregated by two-weekly periods starting on 27<sup>th</sup> May 2021. All periods with fewer than 100 data  
188 points in the national dataset were removed from further analysis to ensure robustness of the data  
189 analyses. The periods were further split by region, and all regional aggregates with fewer than 8 data  
190 points were removed from further analysis. The  $\log_{10}$  mean averages were calculated for GI, GII,  
191 total NoV and  $\Delta G$  from all sites for each of the national and regional two-weekly aggregates. Upward  
192 and downward trends in NoV levels were calculated using a relative strength index (RSI) with the TTR  
193 package (Ulrich, 2021) for R (R Core Team, 2023) according to Chan et al. (2023), using a rolling 6-  
194 week look-back period. Each RSI value was assigned a descriptive trend category according to Table  
195 2.

196

197

198 *Table 2: Descriptive categories for trend analysis based on a relative strength index for a rolling 6-week look back period for*  
199 *norovirus concentrations in wastewater.*

| Category             | Criteria                 |
|----------------------|--------------------------|
| Very likely upward   | RSI $\geq 90$            |
| Likely upward        | RSI $\geq 80$ and $< 90$ |
| Upward               | RSI $\geq 70$ and $< 80$ |
| No trend             | RSI $< 70$ and $> 30$    |
| Downward             | RSI $\leq 30$ and $> 20$ |
| Likely downward      | RSI $\leq 20$ and $> 10$ |
| Very likely downward | RSI $\leq 10$            |

200

#### 201 *Site to site analysis of norovirus data*

202 Due to variability in the timing of sample collection dates, results were aggregated by calendar  
203 month for site specific spatiotemporal analysis. The mean  $\log_{10}$  GI and GII concentrations were  
204 calculated per site and per month for those sites with multiple sample dates within the same month.  
205 Sites that did not have at least one sample result per genogroup per month were removed from the  
206 analysis. This left 140 sites with sample results for NoV GI and GII from June 2021 to March 2022,  
207 yielding a total of 2,800 sample results.

208 The minimum distance to ensure each site would have at least one neighbour (and, therefore, be  
209 included in the local indicators of spatial association (LISA) assessment), was determined, and site  
210 locations were evaluated for spatial autocorrelation at that distance using a modified Ripley's K  
211 analysis (Besag, 1977; Ripley, 1977). LISA assessment of the site  $\log_{10}$  results was carried out using a  
212 Local Moran's I analysis (Anselin, 1995) to identify both clusters and outliers of high or low values.  
213 All of these analyses were carried out using tools available within ArcGIS Pro version 2.9.5 (ESRI,  
214 2022).

#### 215 *Comparison of wastewater data against clinical case numbers*

216 National weekly NoV case numbers were taken from the UKHSA National NoV and rotavirus bulletin  
217 reports (UKHSA, 2023b). The weekly case numbers were aggregated into two-weekly time periods

218 starting on 24<sup>th</sup> May 2021, and the sum of the cases was calculated for each period. Total NoV  
219 concentrations in wastewater were aggregated by two-weekly periods starting on 24<sup>th</sup> May 2021.  
220 The distributions of the aggregated two-weekly case numbers and log<sub>10</sub> average NoV concentrations  
221 were checked for normality with the Shapiro-Wilk test and then compared by linear regression in R.

## 222 Results

223 The data from this study can be freely accessed from (David I. Walker *et al.*, 2024).

### 224 Ammonia and Orthophosphate Concentrations

225 Figure 2 shows the distribution and comparisons of the concentrations of the nutrients ammonia  
226 and orthophosphate in wastewater samples. Of the 3,232 samples, 3,220 had associated ammonia  
227 or orthophosphate data and were used in further analysis. Three additional samples were removed  
228 from further analysis following 3 $\sigma$  rule outlier analysis for ammonia and orthophosphate. According  
229 to Shapiro-Wilk tests, the nutrient concentrations were not normally distributed ( $p < 0.001$  in both  
230 cases). A non-parametric Wilcoxon signed-rank test showed that the pairwise ammonia and  
231 orthophosphate concentrations for samples were significantly different ( $p < 0.001$ ), with ammonia  
232 concentrations exceeding the orthophosphate by a mean average of 1 log<sub>10</sub> mg/l with a standard  
233 deviation of 0.16 log<sub>10</sub> mg/l. A Spearman's rank correlation test between log<sub>10</sub> ammonia and log<sub>10</sub>  
234 orthophosphate concentrations showed a significant correlation with  $\rho = 0.811$  and  $p < 0.001$ .

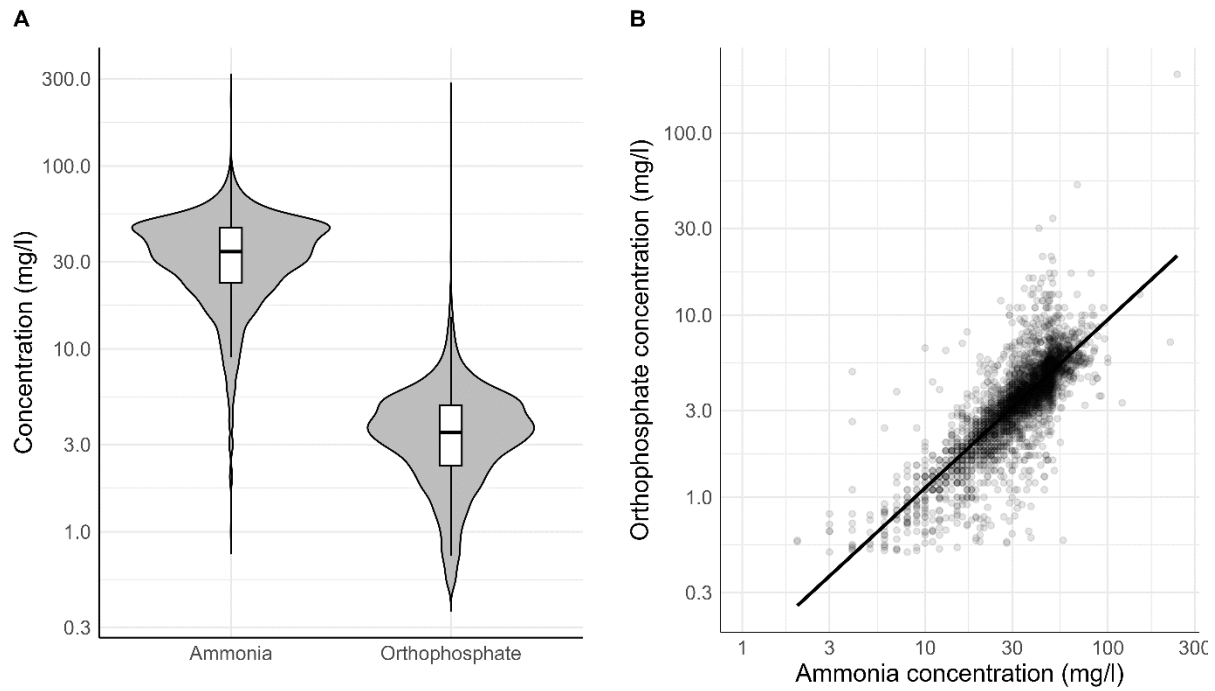

235

236 *Figure 2: (A) Violin and box plots on a log<sub>10</sub> scale, showing the distributions of the ammonia and orthophosphate data for*  
 237 *3,220 wastewater samples collected across England. Grey shaded areas are frequency of data. White boxes are the*  
 238 *interquartile range, horizontal lines represent the median. (B) Scatter plot showing ammonia concentrations vs*  
 239 *orthophosphate concentrations on a log<sub>10</sub> scale. Black line represents a line of best fit on a log<sub>10</sub>-log<sub>10</sub> scale.*

240 **Norovirus concentrations**

241 The LOD<sub>95</sub> and LOQ for the duplex RT-qPCR assay were calculated as 9.5 gc/reaction and 11.4  
 242 gc/reaction respectively for GI and 6.7 and 16.3 gc/reaction respectively for GII. Table 3 shows the  
 243 number of NoV positive samples and number of samples that were either non-detects or <LOQ for  
 244 each genogroup.

245 *Table 3: A summary of the number of samples that had no norovirus genogroup I and II detected or were below the limit of*  
 246 *quantification (LOQ). This is expressed, in brackets, as a percentage of the 3,232 samples.*

| Genogroup | Number of positive samples (%) | Number <LOQ (%) | Number of non-detects (%) |
|-----------|--------------------------------|-----------------|---------------------------|
| GI        | 3,020 (93.4)                   | 639 (19.8)      | 212 (6.6)                 |
| GI        | 3,181 (98.4)                   | 185 (5.7)       | 51 (1.6)                  |
| GI or GII | 3,190 (98.7)                   | 153 (4.7)       | 42 (1.3)                  |

247

248 Figure 3 shows the distributions of the GI and GII concentrations following censoring and  
249 normalisation. Shapiro-Wilk tests indicated that the GI and GII data were not normally distributed. A  
250 non-parametric Wilcoxon signed-rank test indicated that there were significant differences in  
251 pairwise GI and GII concentrations across the national dataset ( $P < 0.001$ ). The median  $\log_{10}$  GI and GII  
252 gene copies per 100k capita were 4.27 and 4.96, respectively.

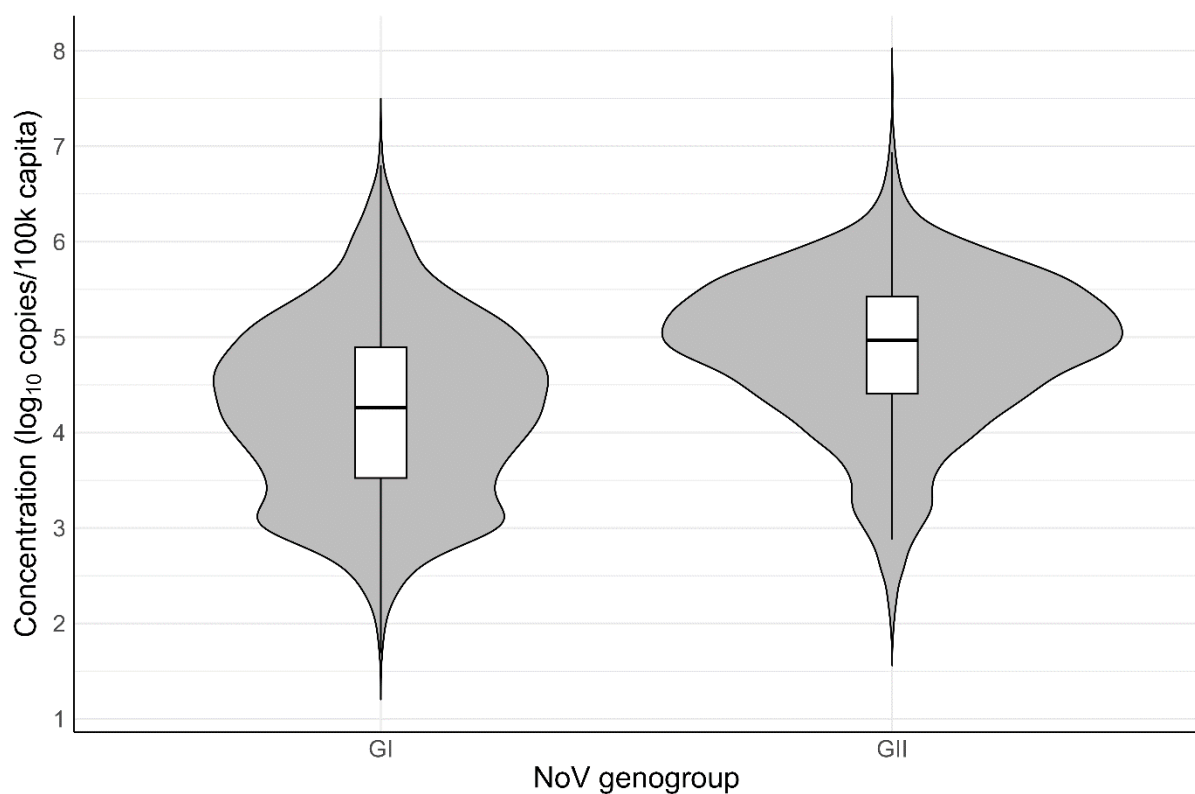

253

254 *Figure 3: Violin and box plots showing the distributions of the  $\log_{10}$  concentrations of norovirus genogroups I (GI) and II (GII)*  
255 *for 3,220 wastewater samples collected across England. The grey shaded areas represent the frequency of data. The white*  
256 *boxes represent the interquartile range, and the horizontal lines represent the median.*

257 Temporal Trends in NoV Concentrations in wastewater

258 Figure 4 shows the overall trend in NoV concentrations in wastewater samples across England  
259 throughout the sampling period (27<sup>th</sup> May 2021 and 30<sup>th</sup> March 2022) as two-weekly mean  
260 concentrations for GI, GII and total NoV with the RSI trends for those periods. During the summer of

261 2021, there was an upward trend in both GI, GII and total NoV levels within wastewater across  
 262 England. This appeared to coincide with the staggered removal of NPIs (lockdown measures) for  
 263 COVID-19, which mostly ended on 19<sup>th</sup> July 2021 (UK Government, 2021b). This was followed by a  
 264 period up to late December 2021 where the GII and total NoV levels showed little overall change.  
 265 However, there was a downward trend in GI in September 2021. In January 2022, there was a  
 266 downward trend in GII and total NoV, which appeared to coincide with the introduction of further  
 267 NPIs for COVID-19, referred to as “Plan B” (UK Government, 2021a). This was followed by a marked  
 268 upward trend in GI levels in February and March 2022, which was reflected by the upward trend in  
 269 total NoV. During this period, the GII levels also trended upward.

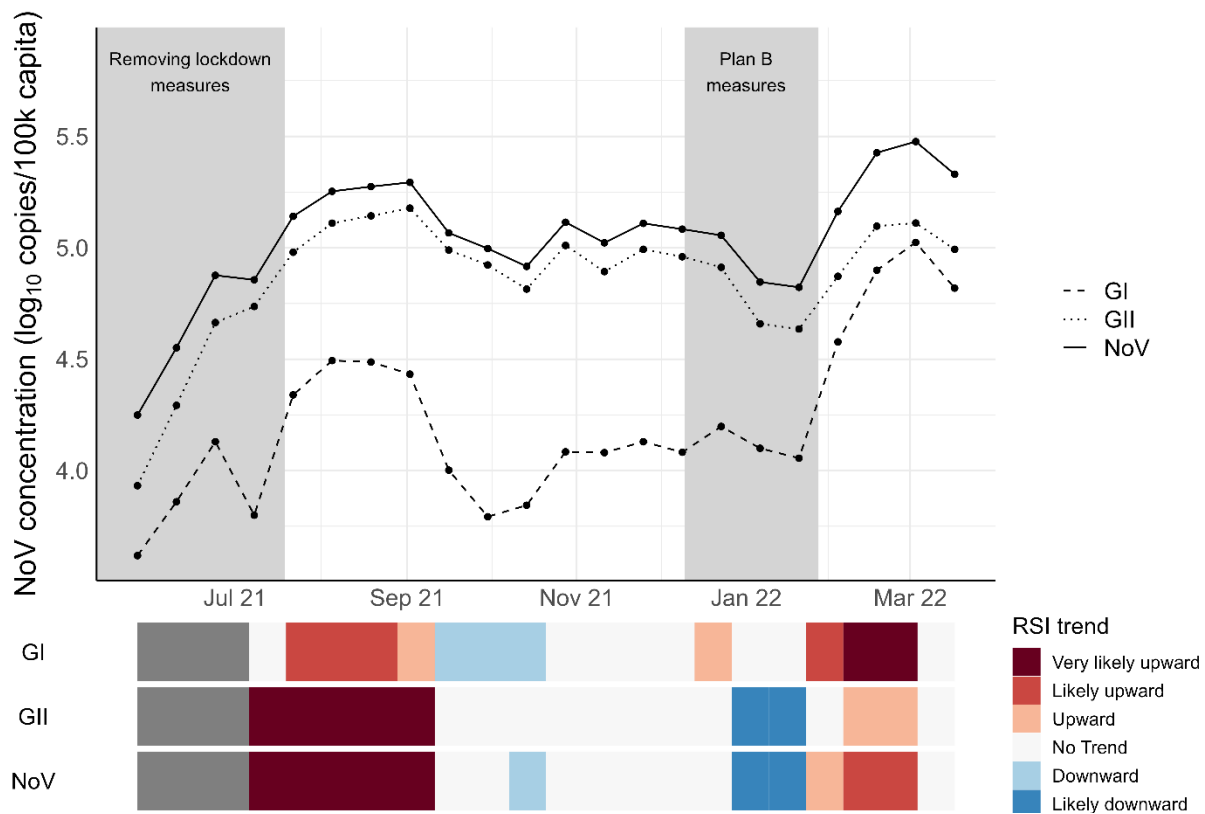

271 *Figure 4: The log<sub>10</sub> national two-weekly national average concentrations of norovirus genogroups I and II, and total*  
 272 *norovirus (GI + GII) from May 2021 to March 2022. The grey shaded areas show periods of non-pharmaceutical*  
 273 *interventions for controlling outbreaks of COVID-19 in England. The relative strength index (RSI) is also shown for each*  
 274 *measure, indicating the strength of the change in concentrations over a 6-week rolling look-back period.*

275 Temporal Trends in Differences Between Genogroup Concentrations ( $\Delta G$ )

276 Figure 5 shows the national average  $\log_{10}$  differences in GI and GII concentrations measured in the  
277 wastewater samples ( $\Delta G$ ) in two-weekly sampling periods. In this case, a value below zero indicates  
278 a higher concentration of GII relative to GI. While  $\Delta G$  appeared to decrease in the first half of the  
279 study,  $\Delta G$  increased over the later period (from October 2021). This indicates an increase in the  
280 proportion of GI relative to GII. Figure 6 shows the regional average  $\log_{10}$  differences in GI and GII  
281 concentrations measured in the wastewater samples ( $\Delta G$ ) in two-weekly sampling periods. A trend  
282 towards higher GI accounting for a higher proportion of the total NoV was particularly apparent in  
283 the north of England towards the end of the sampling period. All three northern regions (Yorkshire  
284 and Humber, North West and North East) had a  $\Delta G$  exceeding 0 for several weeks in 2022.



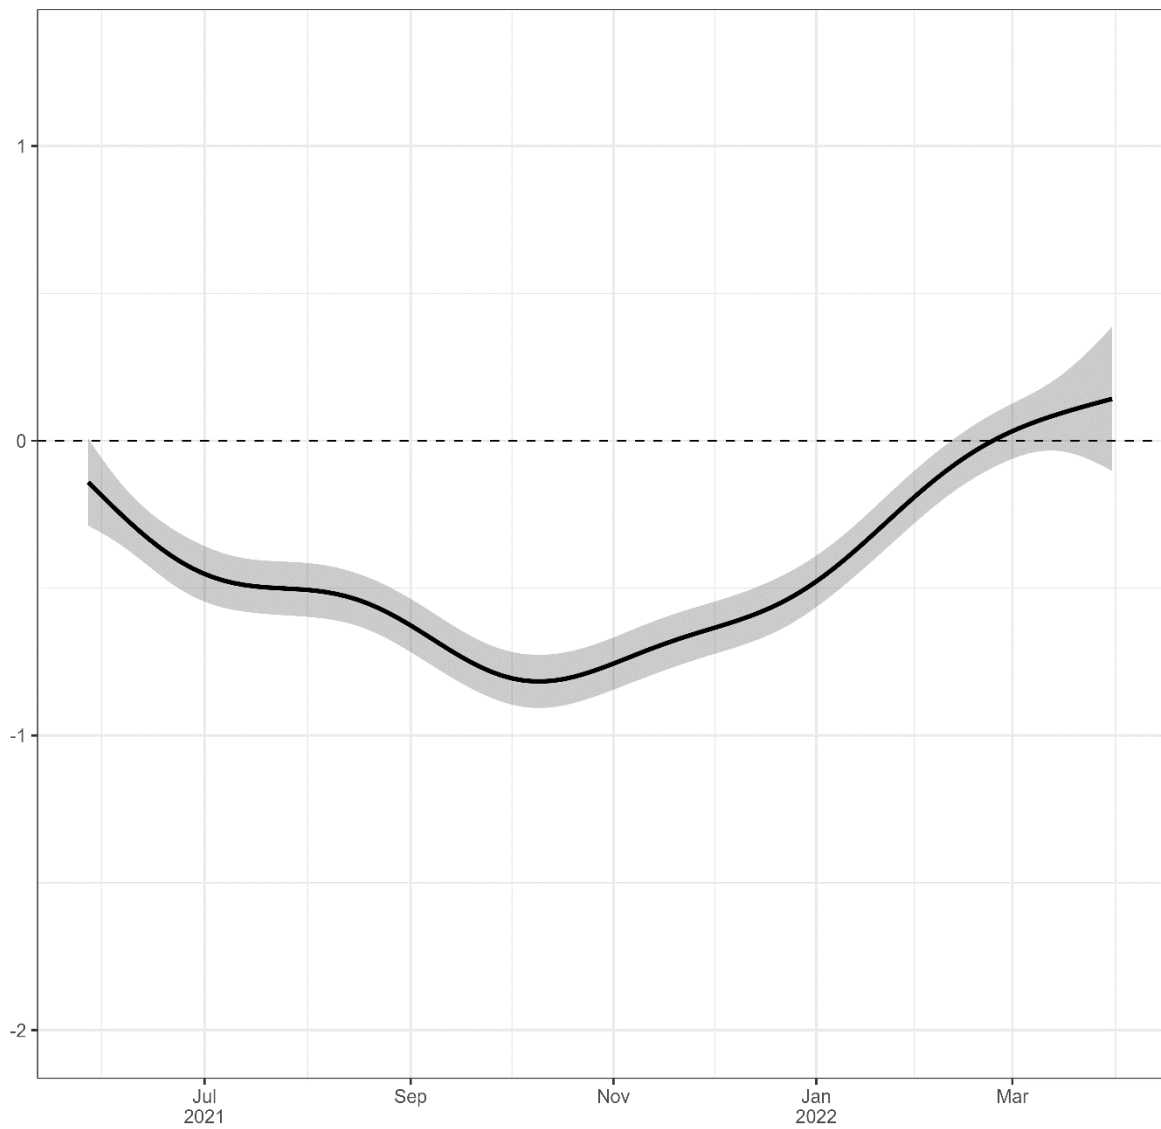

285

286 *Figure 5: Two-weekly average  $\log_{10}$  differences between norovirus genogroups I and II ( $\Delta G$ ) across England from May 2021*

287 *to March 2022. The grey area represents approximate, 95% pointwise confidence intervals.*

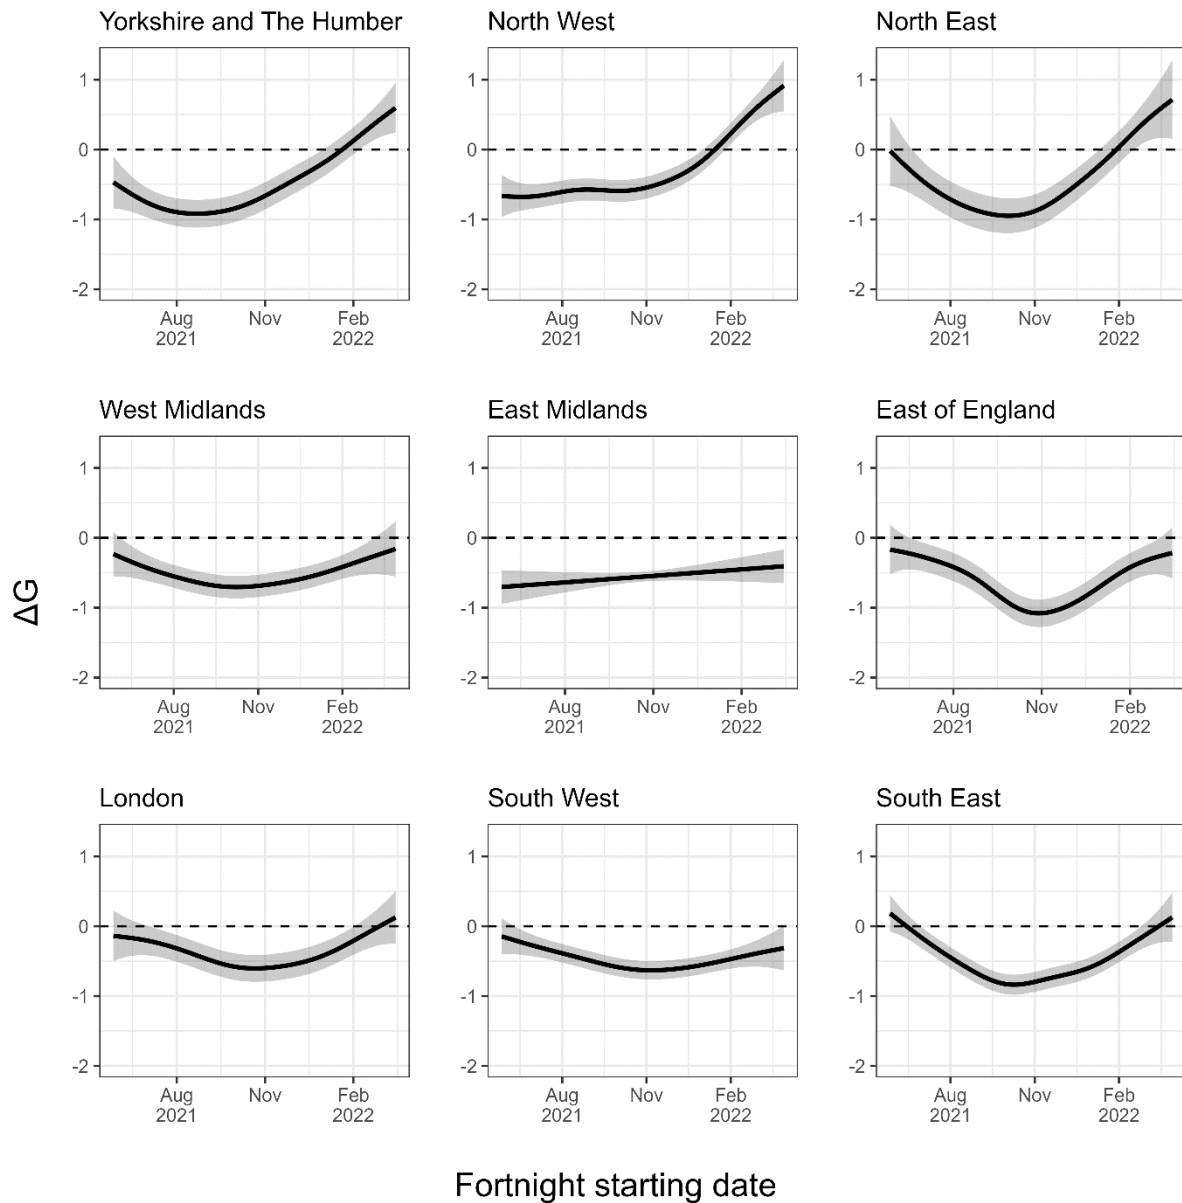

288

289 *Figure 6: Two-weekly average  $\log_{10}$  differences between norovirus genogroups I and II ( $\Delta G$ ) across the nine regions of*  
290 *England from May 2021 to March 2022. The grey area represents approximate, 95% pointwise confidence intervals.*

### 291 Site to Site Analysis of Norovirus Data

292 The minimum distance to ensure each site would have at least one neighbour was approximately 90  
293 km. The modified Ripley's K analysis found no significant spatial autocorrelation at this distance.

294 Monthly results of the Local Moran's I analysis for June 2021, September 2021, December 2021 and

295 March 2022 are shown in Figure 7 for GI and Figure 8 for GII. Significant clusters and outliers were

296 identified for both GI and GII, but these varied between genogroups and over time. High-high

297 clusters were seen for GI in the south of England in June 2021. In September 2021, high-high clusters  
298 of GI were prevalent in the South West, and were no longer seen in the South East. During this time,  
299 there were several GI high-low outliers in the north of England as well as several low-low GI clusters.  
300 In December 2021, there were high-high clusters of GI in the North West. By March 2022, there  
301 were high-high clusters of GI across the north of England. For GII, there were low-low clusters in and  
302 around London in June 2021, with some high-low outliers. Low-low GII clusters and high-low GII  
303 outliers persisted in and around London and the South East in June 2021, and by March 2022, these  
304 were no longer present. In June 2021 and March 2022, there were low-low GI clusters and high-low  
305 GII outliers in the north of England. High-high GII clustering was seen at several sites in the South  
306 West in September 2021, but were no longer present by March 2022.

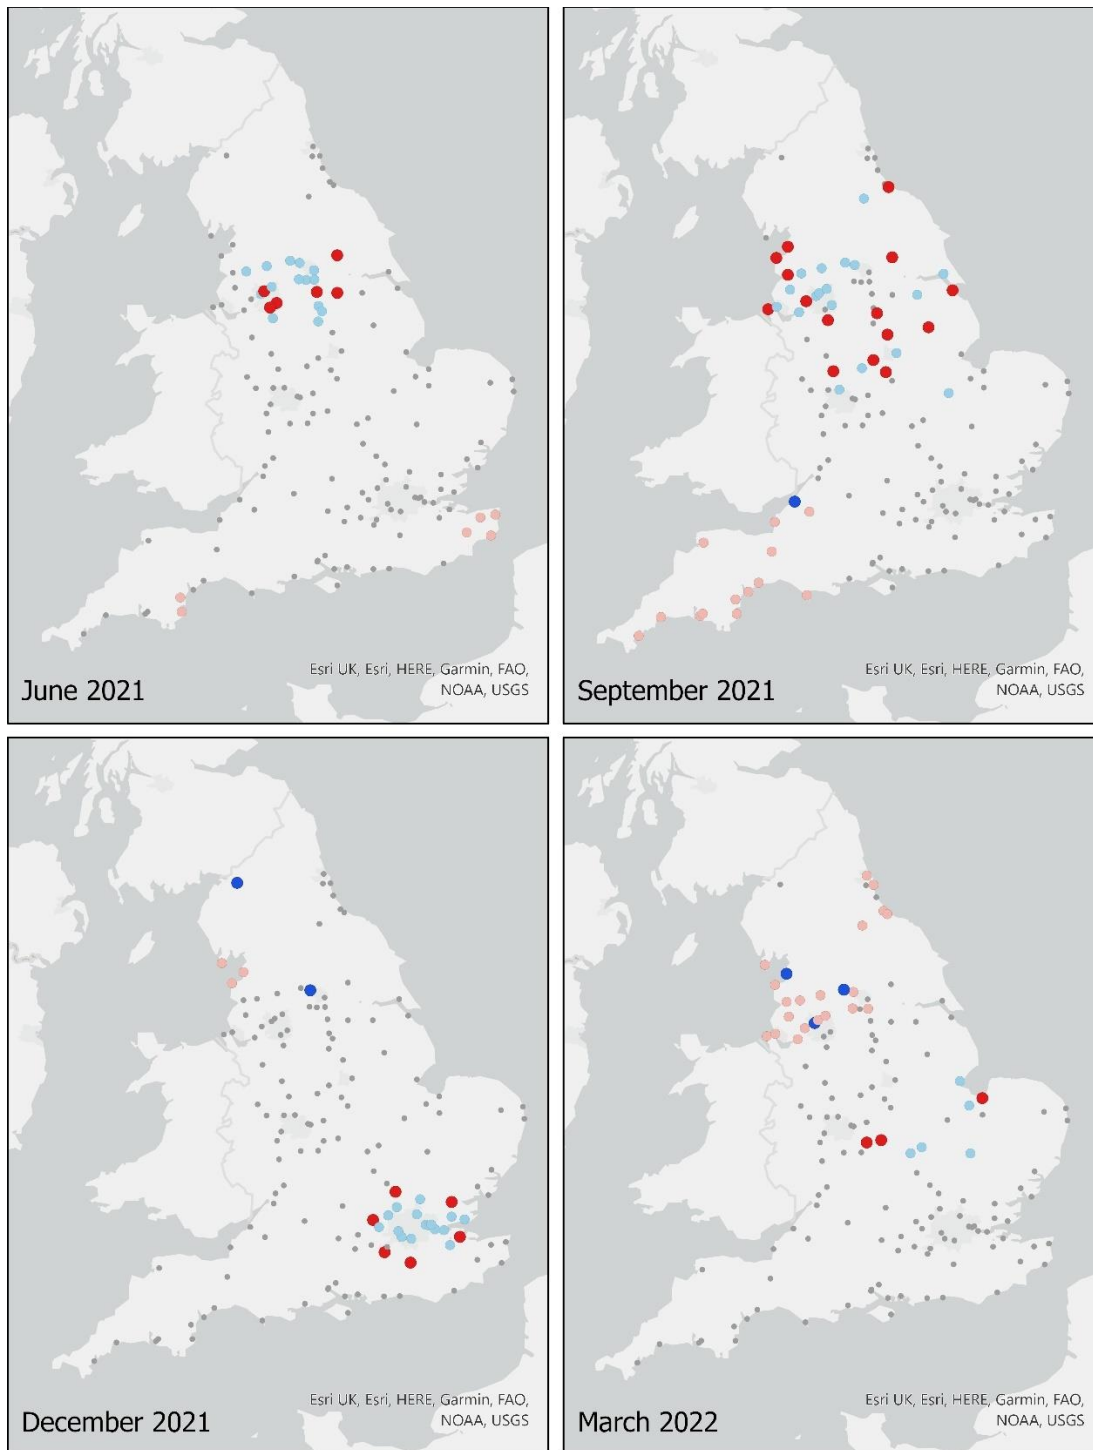

### Local Moran's I Results

- High-High Cluster
- Low-Low Cluster
- High-Low Outlier
- Not Significant
- Low-High Outlier

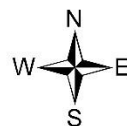

0 75 150 Kilometers

307

308 *Figure 7: The location of the sampled sewage treatment works and the results of Local Moran's I analysis on  $\log_{10}$*

309 *concentrations of norovirus genogroup I from these locations in June 2021, September 2021, December 2021, and March*

310 *2022*

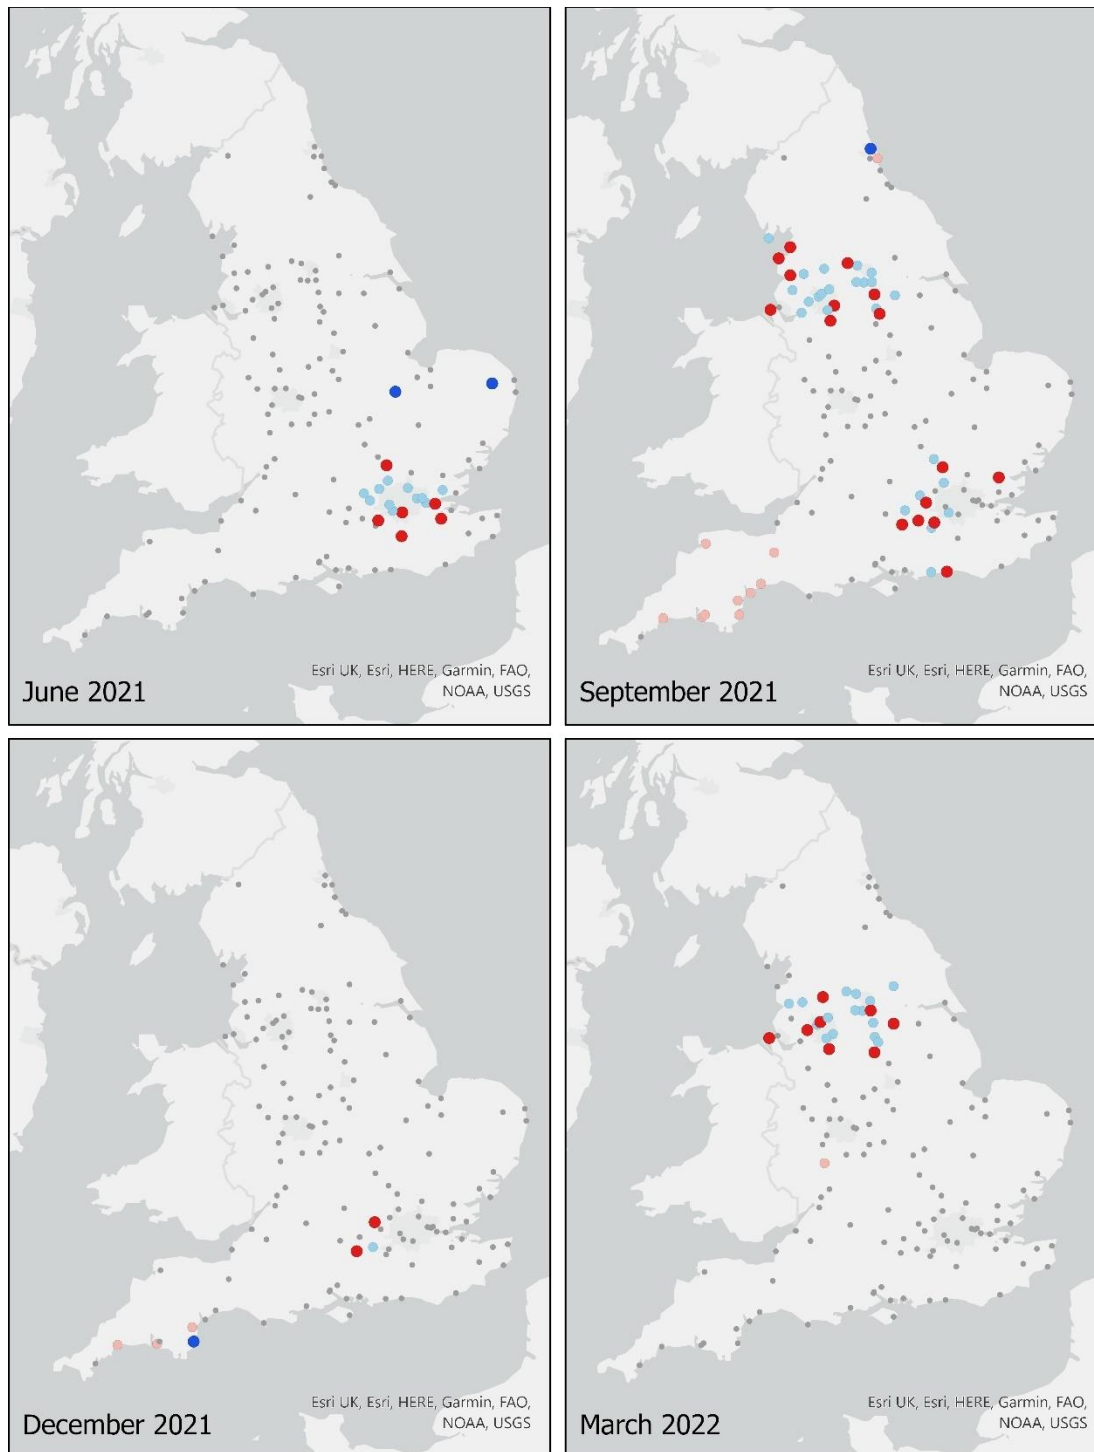

### Local Moran's I Results

- High-High Cluster
- High-Low Outlier
- Low-Low Cluster
- Low-High Outlier
- Not Significant

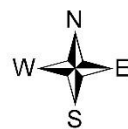

0 75 150 Kilometers

311

312 *Figure 8: The location of the sampled sewage treatment works and the results of Local Moran's I analysis on  $\log_{10}$*

313 *concentrations of norovirus genogroup II from these locations in June 2021, September 2021, December 2021, and March*

314 *2022*

315

316 Comparison of wastewater data against clinical case numbers

317 Linear regression analysis showed a significant ( $p < 0.001$ ) linear relationship between wastewater

318 data vs. clinical case numbers, with a  $R^2$  of 0.614. This relationship was stronger when both

319 measures were compared on a  $\log_{10}$  scale ( $R^2 = 0.720$ ,  $p < 0.001$ ). To determine the effect of flow

320 normalisation on the relationship between  $\log_{10}$  NoV concentration in wastewater and  $\log_{10}$

321 reported case numbers, the linear model was repeated using NoV concentrations not adjusted for

322 flow. The linear relationship remained significant ( $p < 0.001$ ) but was weaker ( $R^2 = 0.634$ ). All further

323 results presented are for flow and population-normalised data.

324 Figure 9 shows the relationship between the two-weekly  $\log_{10}$  NoV case numbers and the two-

325 weekly national average  $\log_{10}$  NoV concentrations in wastewater. In Figure 10, the NoV

326 concentrations in wastewater are compared with case numbers over the sampling period, showing a

327 general consensus between concentrations in wastewater and case numbers over time, but also

328 indicating times where that relationship was weaker.

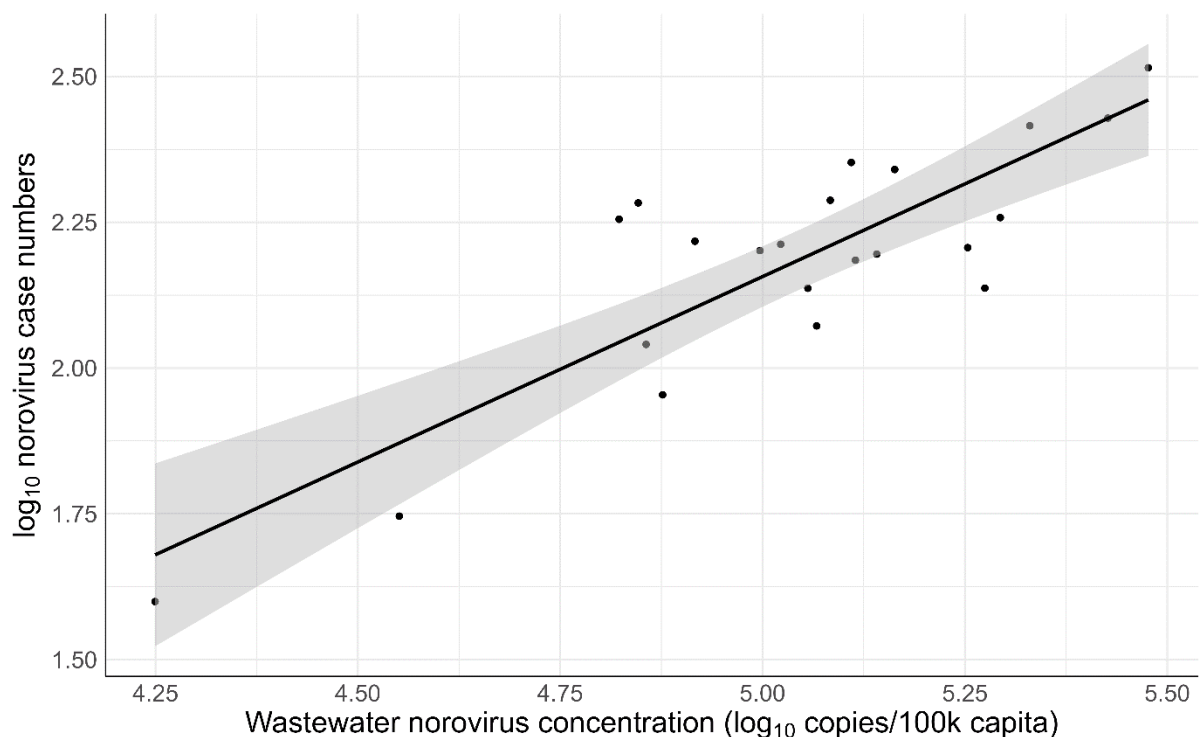

329

330 *Figure 9: Comparison of  $\log_{10}$  national average norovirus concentrations in wastewater against the  $\log_{10}$  number of*  
331 *confirmed norovirus case numbers as reported by UKHSA. Black line represents the linear model, with the grey shaded area*  
332 *representing 95% confidence intervals.*

333

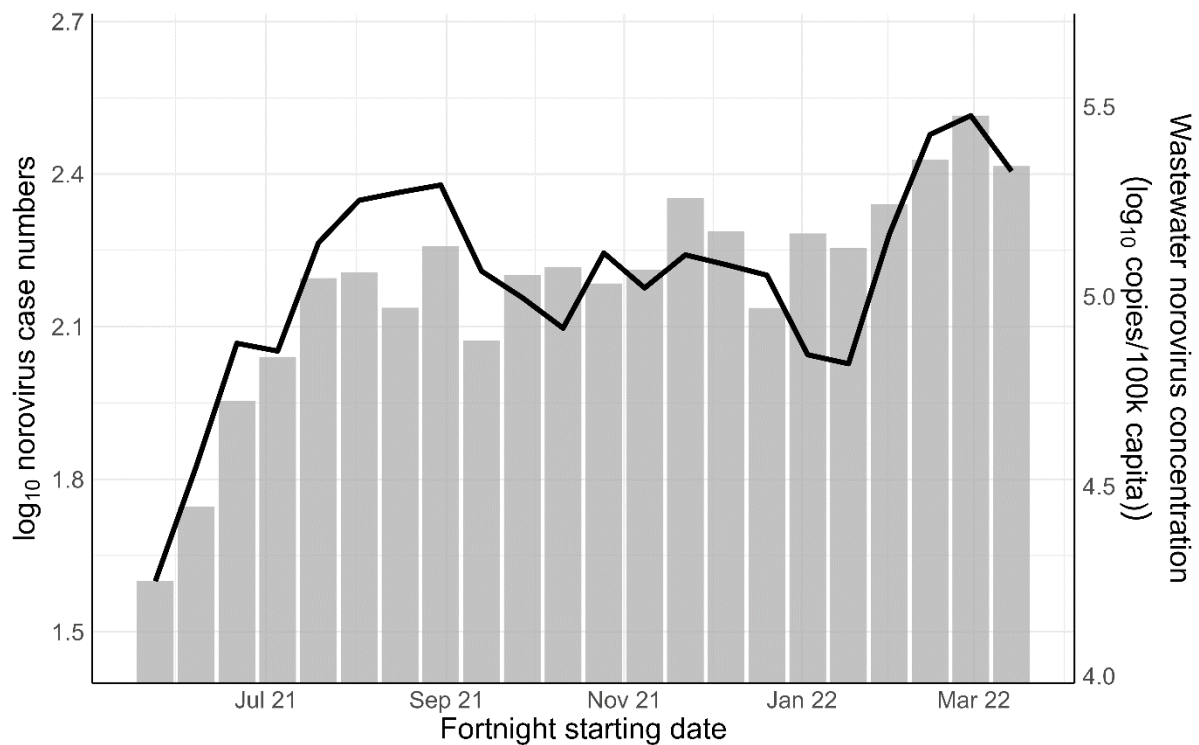

334

335 *Figure 10: Time series comparison of  $\log_{10}$  national average norovirus concentrations in wastewater and the  $\log_{10}$  number*  
336 *of confirmed norovirus case numbers as reported by UKHSA. The black line is the concentrations in wastewater and the grey*  
337 *bars are the number of cases. Note the different scales of the two y-axes.*

## 338 Discussion

339 In this study, the trends in NoV concentrations in wastewater across England were assessed. As in  
340 other studies on viruses in wastewater (Morvan *et al.*, 2022; Scorza *et al.*, 2022), an estimate of flow  
341 and population size was applied as a normalisation factor on the NoV concentration data. For these  
342 samples, ammonia and orthophosphate data were previously collected as part of the Environmental  
343 Monitoring for Health Protection (EMHP) programme for wastewater surveillance of COVID-19 in  
344 England (Sweetapple *et al.*, 2023). These measures were found to correlate significantly, which  
345 supports their use in parallel with each other. It should be noted, however, that potential infiltration  
346 of land runoff and other sources of non-human faecal material into the sewerage network, which

347 may itself be influenced by variations in rainfall and other environmental factors, may also cause  
348 variability in nutrients (Murphy *et al.*, 2015; Beheshti and Sægrov, 2018). Such factors could lead to  
349 misrepresentation of flow, thereby leading to errors in normalisation of the norovirus concentration  
350 data. Other studies have used different factors to normalise viral loads in wastewater, including  
351 concentrations of faecal indicator organisms (Zhan *et al.*, 2022; Langeveld *et al.*, 2023), electrical  
352 conductivity (Langeveld *et al.*, 2023), and other chemicals (Hsu *et al.*, 2022). However, there is  
353 currently no consensus on the most reliable measure, and it is likely that the best indicator will vary  
354 across locations with different geographies and different sewerage infrastructures. Nevertheless,  
355 reanalysis of virus data from this study without the nutrient-based adjustment for estimated flow,  
356 showed a diminished correlation between wastewater NoV concentration and case numbers, as  
357 reflected by a reduction in the strength of their linear relationship. This indicates that while the  
358 nutrient-based normalisation may not be perfect, such adjustments may help to improve the  
359 insights gained from virus concentrations in wastewater.

360 The very high prevalence of NoV in wastewater (99% of samples) was not unexpected given the high  
361 prevalence of norovirus in communities (Tam *et al.*, 2012). According to UKHSA reports from the  
362 same period (UKHSA, 2023b) GII accounted for 90% of the reported clinical cases in 2020 and 2021,  
363 so this approximately 1 log<sub>10</sub> difference between GI and GII might be expected to be reflected to in  
364 wastewater, assuming similar faecal shedding rates for each genogroup. This study did not find this  
365 degree of overall difference between GI and GII concentrations, the average GII concentrations  
366 being approximately 0.7 log<sub>10</sub> greater than GI, and this figure varied considerably across the  
367 sampling period.

368 Similarly, studies of NoV prevalence in bivalve molluscan shellfish (BMS) have shown GII to be present at  
369 higher concentrations in most cases (Lowther *et al.*, 2018; EFSA, 2019). However, this difference found in  
370 BMS may be confounded by differences in binding kinetics of NoV genogroups and genotypes in  
371 BMS digestive tracts (Maalouf *et al.*, 2011; Morozov *et al.*, 2018)



372 A systematic review and meta-analysis of 26 studies by Huang et al. (2022) found that NoV  
373 concentrations in wastewater were typically higher in spring and winter than in summer and  
374 autumn. A similar trend has been shown in both clinical case numbers (UKHSA, 2023b) and BMS  
375 (Lowther *et al.*, 2018; EFSA, 2019). Unlike these studies, the data presented here do not show these  
376 normal seasonal trends. The sampling timeframe for this study encompassed two periods of highly  
377 unusual national restrictions in England due to the Covid-19 pandemic. As such the data and trends  
378 found here were likely not reflective of a more typical period without these restrictions. Despite this,  
379 analysis of the trends under these unusual circumstances revealed some patterns of potential  
380 interest. For example, an upward trend in NoV concentrations during the first half of 2021 suggests  
381 increased person-to-person transmission as national restrictions were lifted during this period.  
382 During late autumn and early winter of 2021, when NoV levels would usually be expected to  
383 increase, no such increase was found and in fact, a likely downward trend in GII and overall NoV  
384 concentrations was observed during the winter period. That may have been a result of further  
385 national restrictions, known as “Plan B”, that were put in place to limit the spread of the Omicron  
386 variant of SARS-CoV-2. Notably, levels of NoV in wastewater increased again as these restrictions  
387 were lifted. This may have led to a delay in the usual winter peak in NoV that was otherwise limited.  
388 Overall, GII remained higher than GI over the sampling period as reflected by the higher average  
389 concentration of GII as previously discussed. However, investigation of the  $\log_{10}$  differences in GI and  
390 GII over time revealed that this relationship did not remain consistent. The first half of the sampling  
391 period was characterised by a general decrease in the concentrations of GI relative to GII. But from  
392 October 2021 onwards, GI concentrations consistently increased relative to GII at a national level.  
393 Further investigation of this pattern at a regional level showed that this was markedly different  
394 across the country. In the northern regions of Yorkshire and The Humber, North West and North  
395 East, GI became the dominant genogroup by the end of the study period, suggesting a localised  
396 spread of GI at that time. This was in contrast to South West, East Midlands and West Midlands  
397 regions, where no strong changing trends in GI and GII levels were evident.

398 Local Moran's I analyses indicated potential localised outbreaks of both GI and GII across England.  
399 The high-high GI clusters seen in the north of England in December 2021 and March 2022 may show  
400 that there was an outbreak of GI in the North West, in the Morecambe Bay area. By March 2022 this  
401 had spread eastward to cover a large part of the north of England. Also during March 2022, there  
402 were several low-low clusters of GII in the north of England that may indicate that GI largely  
403 replaced GII as the dominant genogroup of norovirus in human populations in these regions at that  
404 time. The large number of high-low outliers seen for both GI and GII may be an indication of  
405 localised outbreaks that were contained due to the nature of the communities or the potential start  
406 of a wider outbreak. This shows that Local Moran's I analysis, when used in wastewater surveillance,  
407 can be useful in investigating the spread of pathogens through communities. It should be noted  
408 however, that in the context of the current study, sampling sites were selected with a bias towards  
409 larger population sizes, and primarily in densely populated areas. It therefore cannot be assumed  
410 that the observed trends hold true for the whole population.

411 To determine whether NoV concentrations in wastewater could predict a disease burden from NoV,  
412 the national average  $\log_{10}$  total (GI+GII) concentrations in wastewater were compared with national  
413 total  $\log_{10}$  reported case numbers for two-weekly periods throughout the survey period. The  
414 significant linear relationship between these measures indicates that concentrations of NoV in  
415 wastewater are at least somewhat representative of the disease burden. However, it should be  
416 noted that neither wastewater surveillance nor clinical case numbers are likely to give a completely  
417 accurate picture of the true number of national cases of NoV for various reasons, including sampling  
418 strategy, environmental factors and reporting of cases. The second Infectious Intestinal Diseases  
419 Study (IID2) indicated that NoV cases are currently underestimated at a rate of approximately 300  
420 community incidences per one reported incidence (Tam *et al.*, 2012). Additionally, Ondrikova et al.  
421 (2021) found substantial variability in NoV reporting between English regions and age groups, and  
422 Douglas et al. (2021) found that NoV reporting rates were significantly impacted by national

423 lockdown measures. These factors are likely to result in significant bias in data sets when attempting  
424 to analyse trends.

425 Wastewater-based surveillance of pathogens attempts to minimise this bias by introducing a non-  
426 invasive system and reducing the likelihood of demographic variation in estimates of disease burden.

427 However, the use of wastewater-based surveillance introduces its own biases. Such biases were  
428 discussed in detail in the context of SARS-CoV-2 by Wade et al. (2022), and include factors such as  
429 population characteristics, sewerage network characteristics, sampling strategy and sample analysis.

430 While biases arising from sample analysis methods may be at least partially resolved by optimising  
431 bench methods, the other factors will be more difficult or impossible to resolve. Population  
432 statistics, and environmental and infrastructure data should, therefore, be considered for their value  
433 in supporting, validating, and optimising surveillance programmes that use wastewater-based data

434 sources. Using variations in sewerage network characteristics as an example, it is common to  
435 normalise pathogen load by flow rate and population size (Hsu *et al.*, 2022; Zhan *et al.*, 2022;  
436 Langeveld *et al.*, 2023), as applied in this study, where relative flow was estimated using deviations

437 from average nutrient concentrations on a sample-by-sample basis. As discussed previously, the  
438 inclusion of this type of normalisation strengthened the relationship between clinical case numbers  
439 and NoV concentrations in wastewater. This indicates however, that discrepancies between

440 reported case numbers and viral concentrations in wastewater may, in part, be a result of imperfect  
441 normalisation methods. Due to the likelihood of biases in both reported case data and wastewater-  
442 based data, it is important to recognise that data derived from wastewater are likely to have the

443 greatest value as part of a multi-faceted approach to pathogen surveillance, rather than as the sole  
444 data source. Despite the different biases inherent in both data sources, it is reassuring that there  
445 was a strong correlation between norovirus levels in wastewater and reported clinical cases.

446 The results of this study show the value of wastewater monitoring as a non-invasive tool for  
447 surveillance of enteric diseases such as NoV in human populations. This will be particularly valuable

448 where reporting of cases is low relative to the estimated number of cases in the community, and  
449 where other factors that may bias reporting are dominant.

450 Further optimisation of the sampling programme is required for long-term surveillance systems. This  
451 must include consideration of the most cost-effective number and location of surveillance sites  
452 within any programme, further development of tools for normalisation of viral loadings, improved  
453 characterisation and optimisation of sample analysis methods, and continued work to develop  
454 models for the integration of wastewater data within existing clinical datasets.

## 455 Conclusions

- 456 • The unusual circumstances due to COVID-19 related national restrictions appear to have  
457 reduced the levels of norovirus circulating in communities and therefore wastewater.
- 458 • Variations in the national, regional, and local levels of norovirus genogroups I and II  
459 indicated the potential for use of wastewater-based methods for detecting outbreaks.
- 460 • The high level of conformity between norovirus levels in wastewater and reported clinical  
461 cases suggests that wastewater-based monitoring could provide a valuable source of  
462 information for understanding the epidemiology of norovirus in England.
- 463 • Continued optimisation of sampling programs, considering cost-effective surveillance sites,  
464 improved normalization methods, and integration with clinical datasets, is necessary for  
465 long-term effectiveness.

## 466 Acknowledgements

467 We would like to thank all the members of the EMHP programme for the collection and processing  
468 of all of the samples during the COVID-19 pandemic. We would like to thank Dr Irene Bossano for  
469 her work to provide the sub-set of samples required for this study. We would also like to thank Dr  
470 Sarah Alewijnse for maintaining the data holdings for this project.

471 Funding: This work was funded by His Majesty's Treasury Shared Outcome Fund via the PATH-SAFE  
472 programme.

## 473 References

- 474 Aarestrup, F.M. and Woolhouse, M.E.J. (2020) 'Using sewage for surveillance of antimicrobial  
475 resistance.', *Science*, 367(6478), pp. 630–632. Available at:  
476 <https://doi.org/10.1126/science.aba3432>.
- 477 Alex-Sanders, N. *et al.* (2023) 'Development and validation of a duplex RT-qPCR assay for norovirus  
478 quantification in wastewater samples', *Journal of Virological Methods*, p. 114804. Available at:  
479 <https://doi.org/https://doi.org/10.1016/j.jviromet.2023.114804>.
- 480 Anselin, L. (1995) 'Local Indicators of Spatial Association—LISA', *Geographical Analysis*, 27(2), pp.  
481 93–115. Available at: <https://doi.org/https://doi.org/10.1111/j.1538-4632.1995.tb00338.x>.
- 482 Beheshti, M. and Sægrov, S. (2018) 'Quantification Assessment of Extraneous Water Infiltration and  
483 Inflow by Analysis of the Thermal Behavior of the Sewer Network', *Water*. Available at:  
484 <https://doi.org/10.3390/w10081070>.
- 485 Besag, J. (1977) 'Contribution to the Discussion on Dr. Ripley's Paper', *Journal of the Royal Statistical*  
486 *Society, Series A*, B39, pp. 193–195.
- 487 Boehm, A.B. *et al.* (2023) 'Wastewater concentrations of human influenza, metapneumovirus,  
488 parainfluenza, respiratory syncytial virus, rhinovirus, and seasonal coronavirus nucleic-acids during  
489 the COVID-19 pandemic: a surveillance study', *The Lancet Microbe*, 4(5), pp. e340–e348. Available  
490 at: [https://doi.org/10.1016/S2666-5247\(22\)00386-X](https://doi.org/10.1016/S2666-5247(22)00386-X).
- 491 Bosch, A., Pintó, R.M. and Abad, F.X. (2006) 'Survival and Transport of Enteric Viruses in the  
492 Environment.', *Viruses in Foods*, pp. 151–187. Available at: [https://doi.org/10.1007/0-387-29251-](https://doi.org/10.1007/0-387-29251-9_6)  
493 [9\\_6](https://doi.org/10.1007/0-387-29251-9_6).
- 494 Chan, E.M.G. *et al.* (2023) 'Identifying trends in SARS-CoV-2 RNA in wastewater to infer changing  
495 COVID-19 incidence: Effect of sampling frequency', *PLOS Water*, 2(4), p. e0000088. Available at:  
496 <https://doi.org/10.1371/journal.pwat.0000088>.

- 497 COVIDPoops19 (2023) *Summary of global SARS-CoV-2 wastewater monitoring efforts by UC Merced*  
498 *researchers*. Available at:  
499 <https://www.arcgis.com/apps/dashboards/c778145ea5bb4daeb58d31afee389082> (Accessed: 12  
500 December 2023).
- 501 Diamond, M.B. *et al.* (2022) 'Wastewater surveillance of pathogens can inform public health  
502 responses.', *Nature medicine*, 28(10), pp. 1992–1995. Available at: [https://doi.org/10.1038/s41591-](https://doi.org/10.1038/s41591-022-01940-x)  
503 022-01940-x.
- 504 Douglas, A. *et al.* (2021) 'Impact of COVID-19 on national surveillance of norovirus in England and  
505 potential risk of increased disease activity in 2021.', *The Journal of hospital infection*. England, pp.  
506 124–126. Available at: <https://doi.org/10.1016/j.jhin.2021.03.006>.
- 507 EFSA (2019) 'Analysis of the European baseline survey of norovirus in oysters', *EFSA Journal*, 17(July),  
508 pp. 1–86. Available at: <https://doi.org/10.2903/j.efsa.2019.5762>.
- 509 ESRI (2022) 'ArcGIS Pro: Version 2.9.5.' Environmental Systems Research Institute., Redlands,  
510 California, USA.
- 511 Fumian, T.M. *et al.* (2019) 'Detection of norovirus epidemic genotypes in raw sewage using next  
512 generation sequencing', *Environment International*, 123, pp. 282–291. Available at:  
513 <https://doi.org/https://doi.org/10.1016/j.envint.2018.11.054>.
- 514 Gholipour, S. *et al.* (2022) 'Occurrence of viruses in sewage sludge: A systematic review.', *The*  
515 *Science of the total environment*, 824, p. 153886. Available at:  
516 <https://doi.org/10.1016/j.scitotenv.2022.153886>.
- 517 Gracia-Lor, E. *et al.* (2017) 'Measuring biomarkers in wastewater as a new source of epidemiological  
518 information: Current state and future perspectives', *Environment International*, 99, pp. 131–150.  
519 Available at: <https://doi.org/https://doi.org/10.1016/j.envint.2016.12.016>.
- 520 Hirose, R. *et al.* (2017) 'Mechanism of Human Influenza Virus RNA Persistence and Virion Survival in

- 521 Feces: Mucus Protects Virions From Acid and Digestive Juices', *The Journal of Infectious Diseases*,  
522 216(1), pp. 105–109. Available at: <https://doi.org/10.1093/infdis/jix224>.
- 523 Hsu, S.-Y. *et al.* (2022) 'Biomarkers Selection for Population Normalization in SARS-CoV-2  
524 Wastewater-based Epidemiology.', *medRxiv : the preprint server for health sciences* [Preprint].  
525 United States. Available at: <https://doi.org/10.1101/2022.03.14.22272359>.
- 526 Huang, Y. *et al.* (2022) 'Norovirus detection in wastewater and its correlation with human  
527 gastroenteritis: a systematic review and meta-analysis.', *Environmental science and pollution*  
528 *research international*, 29(16), pp. 22829–22842. Available at: [https://doi.org/10.1007/s11356-021-](https://doi.org/10.1007/s11356-021-18202-x)  
529 18202-x.
- 530 Jones, D.L. *et al.* (2020) 'Shedding of SARS-CoV-2 in feces and urine and its potential role in person-  
531 to-person transmission and the environment-based spread of COVID-19.', *The Science of the total*  
532 *environment*, 749, p. 141364. Available at: <https://doi.org/10.1016/j.scitotenv.2020.141364>.
- 533 Kasprzyk-Hordern, B. *et al.* (2023) 'Wastewater-based epidemiology for comprehensive community  
534 health diagnostics in a national surveillance study: Mining biochemical markers in wastewater',  
535 *Journal of Hazardous Materials*, 450, p. 130989. Available at:  
536 <https://doi.org/https://doi.org/10.1016/j.jhazmat.2023.130989>.
- 537 Kazama, S. *et al.* (2016) 'Temporal dynamics of norovirus determined through monitoring of  
538 municipal wastewater by pyrosequencing and virological surveillance of gastroenteritis cases.',  
539 *Water research*, 92, pp. 244–253. Available at: <https://doi.org/10.1016/j.watres.2015.10.024>.
- 540 Keaveney, S. *et al.* (2022) 'Impact of COVID-19 Nonpharmaceutical Interventions on the Extent of  
541 Norovirus Contamination in Oyster Production Areas in Ireland during Winter 2020 to 2021', *Journal*  
542 *of Food Protection*, 85(10), pp. 1397–1403. Available at: [https://doi.org/https://doi.org/10.4315/JFP-](https://doi.org/https://doi.org/10.4315/JFP-22-031)  
543 22-031.
- 544 Keshaviah, A. *et al.* (2023) 'Wastewater monitoring can anchor global disease surveillance systems.',

- 545 *The Lancet. Global health*, 11(6), pp. e976–e981. Available at: <https://doi.org/10.1016/S2214->  
546 109X(23)00170-5.
- 547 Klapsa, D. *et al.* (2022) ‘Sustained detection of type 2 poliovirus in London sewage between February  
548 and July, 2022, by enhanced environmental surveillance’, *The Lancet*, 400(10362), pp. 1531–1538.  
549 Available at: [https://doi.org/10.1016/S0140-6736\(22\)01804-9](https://doi.org/10.1016/S0140-6736(22)01804-9).
- 550 Langeveld, J. *et al.* (2023) ‘Normalisation of SARS-CoV-2 concentrations in wastewater: The use of  
551 flow, electrical conductivity and crAssphage’, *Science of The Total Environment*, 865, p. 161196.  
552 Available at: <https://doi.org/https://doi.org/10.1016/j.scitotenv.2022.161196>.
- 553 Link-Gelles, R. *et al.* (2022) ‘Public Health Response to a Case of Paralytic Poliomyelitis in an  
554 Unvaccinated Person and Detection of Poliovirus in Wastewater - New York, June-August 2022.’,  
555 *MMWR. Morbidity and mortality weekly report*, 71(33), pp. 1065–1068. Available at:  
556 <https://doi.org/10.15585/mmwr.mm7133e2>.
- 557 Lowther, J.A. *et al.* (2018) ‘A One-Year Survey of Norovirus in UK Oysters Collected at the Point of  
558 Sale.’, *Food and environmental virology*, 10(3), pp. 278–287. Available at:  
559 <https://doi.org/10.1007/s12560-018-9338-4>.
- 560 Maalouf, H. *et al.* (2011) ‘Strain-Dependent Norovirus Bioaccumulation in Oysters’, *Applied and*  
561 *Environmental Microbiology*, 77(10), pp. 3189–3196. Available at:  
562 <https://doi.org/http://dx.doi.org/10.1128/AEM.03010-10>.
- 563 Morozov, V. *et al.* (2018) ‘Pandemic GII . 4 Sydney and Epidemic Display Distinct Specificities for  
564 Histo-Blood Group Antigens Leading to Different Transmission Vector Dynamics in Pacific Oysters’,  
565 9(November), pp. 1–9. Available at: <https://doi.org/10.3389/fmicb.2018.02826>.
- 566 Morvan, M. *et al.* (2022) ‘An analysis of 45 large-scale wastewater sites in England to estimate SARS-  
567 CoV-2 community prevalence’, *Nature Communications*, 13(1), p. 4313.
- 568 Murphy, S. *et al.* (2015) ‘Quantifying faecal indicator organism hydrological transfer pathways and



569 phases in agricultural catchments.’, *The Science of the total environment*, 520, pp. 286–299.  
570 Available at: <https://doi.org/10.1016/j.scitotenv.2015.02.017>.

571 Ondrikova, N. *et al.* (2021) ‘Understanding norovirus reporting patterns in England: a mixed model  
572 approach’, *BMC Public Health*, 21(1), p. 1245. Available at: [https://doi.org/10.1186/s12889-021-](https://doi.org/10.1186/s12889-021-11317-3)  
573 11317-3.

574 ONS (2017) *Regions (December 2015) Full Clipped Boundaries in England*. Available at:  
575 [https://www.data.gov.uk/dataset/daf9a3e6-6713-462b-9465-a2dd8a3309e8/regions-december-](https://www.data.gov.uk/dataset/daf9a3e6-6713-462b-9465-a2dd8a3309e8/regions-december-2015-full-clipped-boundaries-in-england)  
576 2015-full-clipped-boundaries-in-england (Accessed: 1 October 2023).

577 ONS (2022) *Population estimates for the UK, England, Wales, Scotland and Northern Ireland: mid-*  
578 *2021, Data and analysis from Census 2021*. Available at:  
579 [https://www.ons.gov.uk/peoplepopulationandcommunity/populationandmigration/populationesti](https://www.ons.gov.uk/peoplepopulationandcommunity/populationandmigration/populationestimates/bulletins/annualmidyearpopulationestimates/mid2021)  
580 [mates/bulletins/annualmidyearpopulationestimates/mid2021](https://www.ons.gov.uk/peoplepopulationandcommunity/populationandmigration/populationestimates/bulletins/annualmidyearpopulationestimates/mid2021) (Accessed: 12 December 2023).

581 Paul, J.R., Trask, J.D. and Gard, S. (1940) ‘Poliomyelitic virus in urban sewage’, *The Journal of*  
582 *experimental medicine*, 71(6), pp. 765–777. Available at: <https://doi.org/10.1084/jem.71.6.765>.

583 R Core Team (2023) *R: A Language and Environment for Statistical Computing*. Available at:  
584 <https://www.r-project.org/> (Accessed: 4 September 2023).

585 Ripley, B.D. (1977) ‘Modelling spatial patterns’, *Journal of the Royal Statistical Society, Series B*, (39),  
586 pp. 172–192.

587 Roberts, A. *et al.* (2022) *Data normalisation of RT-qPCR data for detection of SARS-CoV-2 in*  
588 *wastewater V.1*. Available at: <https://dx.doi.org/10.17504/protocols.io.b4eqqtdw> (Accessed: 4  
589 September 2023).

590 Scorza, L.C.T. *et al.* (2022) ‘SARS-CoV-2 RNA levels in Scotland’s wastewater.’, *Scientific data*, 9(1), p.  
591 713. Available at: <https://doi.org/10.1038/s41597-022-01788-3>.

- 592 Scott, G. *et al.* (2023) 'The Inhibition and Variability of Two Different RT-qPCR Assays Used for  
593 Quantifying SARS-CoV-2 RNA in Wastewater', *Food and Environmental Virology*, pp. 1–11. Available  
594 at: <https://doi.org/https://doi.org/10.1007/s12560-022-09542-z>.
- 595 Simpson, G. (2017) *Comparing smooths in factor-smooth interactions II ordered factors. From the*  
596 *bottom of the heap*. Available at: [https://fromthebottomoftheheap.net/2017/12/14/difference-](https://fromthebottomoftheheap.net/2017/12/14/difference-splines-ii/)  
597 [splines-ii/](https://fromthebottomoftheheap.net/2017/12/14/difference-splines-ii/) (Accessed: 6 February 2024).
- 598 Simpson, G. (2024) *gratia: Graceful 'ggplot'-Based Graphics and Other Functions for GAMs Fitted*  
599 *Using 'mgcv' R package version 0.8.2*. Available at: <https://gavinsimpson.github.io/gratia/> (Accessed:  
600 6 February 2024).
- 601 Sims, N. and Kasprzyk-Hordern, B. (2020) 'Future perspectives of wastewater-based epidemiology:  
602 Monitoring infectious disease spread and resistance to the community level', *Environment*  
603 *International*, 139, p. 105689. Available at:  
604 <https://doi.org/https://doi.org/10.1016/j.envint.2020.105689>.
- 605 Standing Committee of Analysts (1981) *Ammonia in Waters*. Available at:  
606 [https://standingcommitteeofanalysts.co.uk/wp-content/uploads/Blue\\_Book\\_Library/48.pdf](https://standingcommitteeofanalysts.co.uk/wp-content/uploads/Blue_Book_Library/48.pdf)  
607 (Accessed: 4 September 2023).
- 608 Standing Committee of Analysts (1992) *Phosphorus and Silicon in Waters, Effluents and Sludges*.  
609 Available at: [https://standingcommitteeofanalysts.co.uk/wp-](https://standingcommitteeofanalysts.co.uk/wp-content/uploads/Blue_Book_Library/147.pdf)  
610 [content/uploads/Blue\\_Book\\_Library/147.pdf](https://standingcommitteeofanalysts.co.uk/wp-content/uploads/Blue_Book_Library/147.pdf) (Accessed: 4 September 2023).
- 611 Sweetapple, C. *et al.* (2023) 'Dynamic population normalisation in wastewater-based epidemiology  
612 for improved understanding of the SARS-CoV-2 prevalence: a multi-site study', *Journal of Water and*  
613 *Health*, 21(5), pp. 625–642. Available at: <https://doi.org/10.2166/wh.2023.318>.
- 614 Tam, C. *et al.* (2012) *The Second Study of Infectious Intestinal Disease in the Community (IID2 Study)*  
615 *Final Report*. Available at: <https://www.food.gov.uk/sites/default/files/media/document/711-1->

- 616 1393\_IID2\_FINAL\_REPORT.pdf (Accessed: 1 September 2023).
- 617 UK Government (2021a) *Prime Minister confirms move to Plan B in England*, Gov.uk. Available at:  
618 <https://www.gov.uk/government/news/prime-minister-confirms-move-to-plan-b-in-england>  
619 (Accessed: 25 November 2023).
- 620 UK Government (2021b) *Prime Minister urges caution as England moves to Step 4*, Gov.uk. Available  
621 at: [https://www.gov.uk/government/news/prime-minister-urges-caution-as-england-moves-to-step-](https://www.gov.uk/government/news/prime-minister-urges-caution-as-england-moves-to-step-4)  
622 [4](https://www.gov.uk/government/news/prime-minister-urges-caution-as-england-moves-to-step-4) (Accessed: 24 November 2023).
- 623 UKHSA (2023a) *EMHP wastewater monitoring of SARS-CoV-2 in England: 15 July 2020 to 30 March*  
624 *2022*. Available at: [https://www.gov.uk/government/publications/monitoring-of-sars-cov-2-rna-in-](https://www.gov.uk/government/publications/monitoring-of-sars-cov-2-rna-in-england-wastewater-monthly-statistics-15-july-2020-to-30-march-2022/emhp-wastewater-monitoring-of-sars-cov-2-in-england-15-july-2020-to-30-march-2022)  
625 [england-wastewater-monthly-statistics-15-july-2020-to-30-march-2022/emhp-wastewater-](https://www.gov.uk/government/publications/monitoring-of-sars-cov-2-rna-in-england-wastewater-monthly-statistics-15-july-2020-to-30-march-2022/emhp-wastewater-monitoring-of-sars-cov-2-in-england-15-july-2020-to-30-march-2022)  
626 [monitoring-of-sars-cov-2-in-england-15-july-2020-to-30-march-2022](https://www.gov.uk/government/publications/monitoring-of-sars-cov-2-rna-in-england-wastewater-monthly-statistics-15-july-2020-to-30-march-2022/emhp-wastewater-monitoring-of-sars-cov-2-in-england-15-july-2020-to-30-march-2022) (Accessed: 1 November 2023).
- 627 UKHSA (2023b) *National norovirus and rotavirus report, week 28 report: data up to week 26 (2 July*  
628 *2023)*. Available at: [https://www.gov.uk/government/statistics/national-norovirus-and-rotavirus-](https://www.gov.uk/government/statistics/national-norovirus-and-rotavirus-surveillance-reports-2022-to-2023-season/national-norovirus-and-rotavirus-report-week-28-report-data-up-to-week-26-2-july-2023)  
629 [surveillance-reports-2022-to-2023-season/national-norovirus-and-rotavirus-report-week-28-report-](https://www.gov.uk/government/statistics/national-norovirus-and-rotavirus-surveillance-reports-2022-to-2023-season/national-norovirus-and-rotavirus-report-week-28-report-data-up-to-week-26-2-july-2023)  
630 [data-up-to-week-26-2-july-2023](https://www.gov.uk/government/statistics/national-norovirus-and-rotavirus-surveillance-reports-2022-to-2023-season/national-norovirus-and-rotavirus-report-week-28-report-data-up-to-week-26-2-july-2023) (Accessed: 1 November 2023).
- 631 UKHSA (2023c) *Wastewater testing coverage data for the Environmental Monitoring for Health*  
632 *Protection (EMHP) programme*. Available at:  
633 [https://www.gov.uk/government/publications/wastewater-testing-coverage-data-for-23-february-](https://www.gov.uk/government/publications/wastewater-testing-coverage-data-for-23-february-2022-emhp-programme/wastewater-testing-coverage-data-for-the-environmental-monitoring-for-health-protection-emhp-programme)  
634 [2022-emhp-programme/wastewater-testing-coverage-data-for-the-environmental-monitoring-for-](https://www.gov.uk/government/publications/wastewater-testing-coverage-data-for-23-february-2022-emhp-programme/wastewater-testing-coverage-data-for-the-environmental-monitoring-for-health-protection-emhp-programme)  
635 [health-protection-emhp-programme](https://www.gov.uk/government/publications/wastewater-testing-coverage-data-for-23-february-2022-emhp-programme/wastewater-testing-coverage-data-for-the-environmental-monitoring-for-health-protection-emhp-programme) (Accessed: 1 November 2023).
- 636 Ulrich, J. (2021) *TTR: Technical Trading Rules*, CRAN. Available at: [https://cran.r-](https://cran.r-project.org/package=TTR)  
637 [project.org/package=TTR](https://cran.r-project.org/package=TTR) (Accessed: 4 September 2023).
- 638 Wade, M.J. *et al.* (2022) 'Understanding and managing uncertainty and variability for wastewater  
639 monitoring beyond the pandemic: Lessons learned from the United Kingdom national COVID-19

- 640 surveillance programmes', *Journal of hazardous materials*, 424, p. 127456. Available at:  
641 <https://doi.org/10.1016/j.jhazmat.2021.127456>.
- 642 Walker, D.I. (2022) *Protocol for validation of methods for quantifying micro-organisms in wastewater*  
643 *using nucleic acid amplification-based techniques*. Available at:  
644 [https://www.cefas.co.uk/media/p1rjheos/cv019-p002-protocol-for-validation-of-methods-for-](https://www.cefas.co.uk/media/p1rjheos/cv019-p002-protocol-for-validation-of-methods-for-quantifying-micro-organisms-in-wastewater-v1-1-final.pdf)  
645 [quantifying-micro-organisms-in-wastewater-v1-1-final.pdf](https://www.cefas.co.uk/media/p1rjheos/cv019-p002-protocol-for-validation-of-methods-for-quantifying-micro-organisms-in-wastewater-v1-1-final.pdf) (Accessed: 4 September 2023).
- 646 Walker, D.I. *et al.* (2024) *Norovirus, ammonia and orthophosphate in wastewater samples collected*  
647 *from across England 2021 - 2022. V1, Cefas, UK*. Available at:  
648 <https://doi.org/10.14466/CefasDataHub.148> (Accessed: 6 February 2024).
- 649 Walker, D.I. *et al.* (2024) *Quantification of SARS-CoV-2 in wastewater, protocols.io*. Available at:  
650 [dx.doi.org/10.17504/protocols.io.81wgbx39ylpk/v1](https://doi.org/10.17504/protocols.io.81wgbx39ylpk/v1) (Accessed: 6 March 2024).
- 651 Wang, H. *et al.* (2023) 'Measures against COVID-19 affected the spread of human enteric viruses in a  
652 Swedish community, as found when monitoring wastewater', *Science of The Total Environment*, 895,  
653 p. 165012. Available at: [https://doi.org/https://doi.org/10.1016/j.scitotenv.2023.165012](https://doi.org/10.1016/j.scitotenv.2023.165012).
- 654 Wolfe, M.K. *et al.* (2023) 'Use of Wastewater for Mpox Outbreak Surveillance in California', *New*  
655 *England Journal of Medicine*, 388(6), pp. 570–572. Available at:  
656 <https://doi.org/10.1056/NEJMc2213882>.
- 657 Wood, S.N. (2003) 'Thin Plate Regression Splines', *Journal of the Royal Statistical Society. Series B*  
658 *(Statistical Methodology)*, 65(1), pp. 95–114. Available at: <http://www.jstor.org/stable/3088828>.
- 659 Wood, S.N. (2017) *Generalized Additive Models: An Introduction with R*. Chapman and Hall/CRC.
- 660 Zhan, Q. *et al.* (2022) 'Relationships between SARS-CoV-2 in Wastewater and COVID-19 Clinical Cases  
661 and Hospitalizations, with and without Normalization against Indicators of Human Waste.', *ACS*  
662 *ES&T water*, 2(11), pp. 1992–2003. Available at: <https://doi.org/10.1021/acsestwater.2c00045>.

663 Zhou, N. *et al.* (2016) 'Molecular epidemiology of GI and GII noroviruses in sewage: 1-year  
664 surveillance in eastern China.', *Journal of applied microbiology*, 121(4), pp. 1172–1179. Available at:  
665 <https://doi.org/10.1111/jam.13218>.

666
